# Supplementary material for: A Case Study Describing a Community-Engaged Approach for Evaluating Polycyclic Aromatic Hydrocarbon Exposure in a Native American Community
Source: PubMed Central journal article supplement (PMC6388274; doi:10.3390/ijerph16030327), 2019-01-24
Supplement: ijerph-16-00327-s001.pdf [file ijerph-16-00327-s001.pdf]

Supplemental Figure 1. Infographic provided to reduce exposure to candle smoke.

# Choosing the Best Candle

Candles come in many varieties.

Candles can produce smoke that may contain harmful chemicals. Reduce smoke by following these steps:

## Types of Candles

### Best

Beeswax

- low smoke
- fast burning

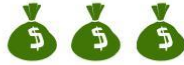

Soy

- low smoke
- long burning

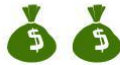

### Good

Paraffin (common)

- smoke
- medium burn time
- quality varies

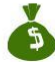

**X** Any Scented Candle

### Bad

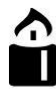

Buy high quality candles. These burn more steadily and produce less smoke.

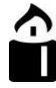

Trim the candle wick to 1/8 of an inch (the height of 2 stacked quarters)

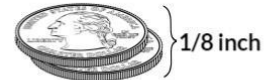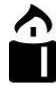

Buy unscented candles. The perfumes used can sometimes contain harmful chemicals.

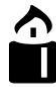

Use a large glass candle holder. This prevents the wick from moving and smoking.

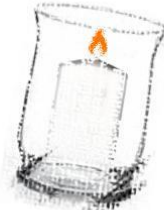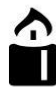

Open windows regularly or use fans to disperse smoke.

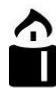

Consider using a candle snuffer to put out your candle and reduce smoking.

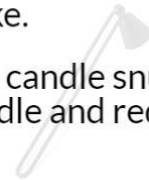

Supplemental Figure 2. Infographic describing various methods of reducing exposure to polycyclic aromatic hydrocarbons.

# REDUCING EXPOSURE TO PAHs

Polycyclic Aromatic Hydrocarbons are common environmental pollutants

## How to reduce exposure

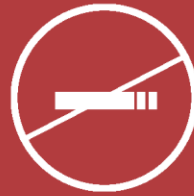

### AVOID

Avoid e-cigarettes and cigarette/cigar smoke

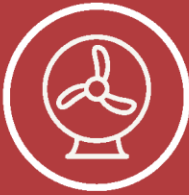

### VENTILATE

When cooking or using a wood-fired stove/fire, run fans or open windows. Grill or smoke outdoors.

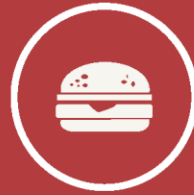

### ROTATE FOODS

Rotate smoked, grilled and charboiled foods with baked, steamed and canned foods.

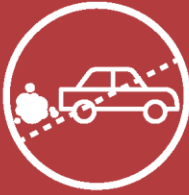

### LIMIT

When possible, limit exposure to gasoline and diesel fumes (vehicles, machinery)

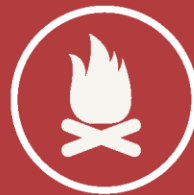

### MAINTAIN

If you use a wood stove, make sure the openings and chimney do not leak smoke indoors.

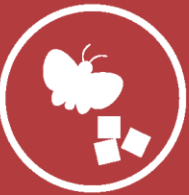

### REPLACE

For pest control, consider cedar shavings or blocks instead of naphthalene mothballs.

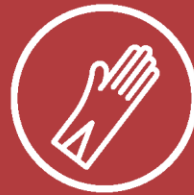

### PROTECT

Wear gloves to avoid skin contact with soot or creosote-treated lumber. Wear a mask if cutting treated lumber.

*Could go to International Journal of Environmental Research and Public Health, Environmental Justice, Environmental Health (maybe) or Environmental Health Insights...or other? Preference?*
